# Supplementary material for: Anti-Allergic Inflammatory Effect of Agarum cribrosum and Its Phlorotannin Component, Trifuhalol A, against the Ovalbumin-Induced Allergic Asthma Model
Source: MDPI journal article supplement (doi:10.3390/cimb45110557), 2023-11-05
Supplement: s1 [file s1]

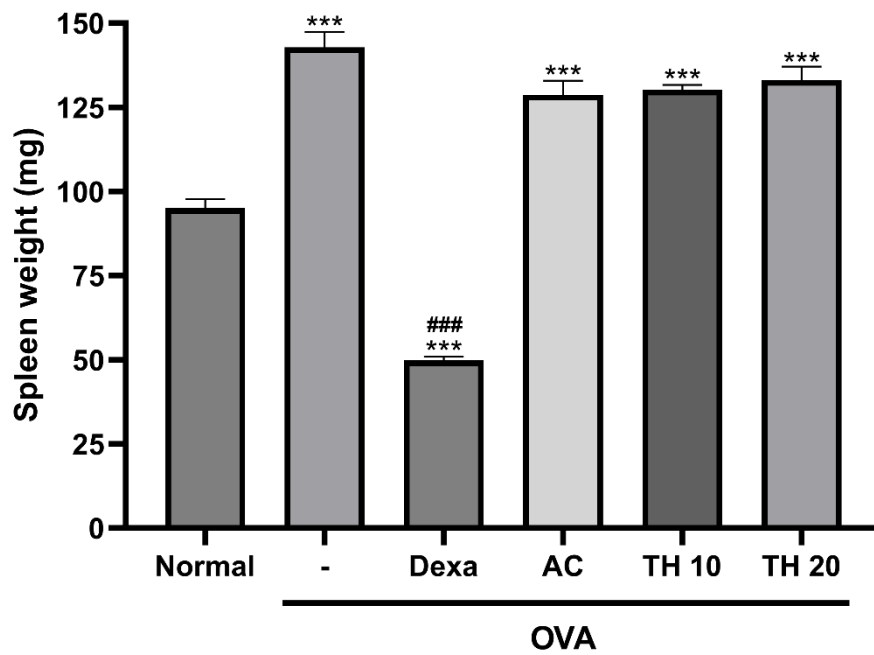

**Figure S1.** Effect of dexamethasone, AC extract, and trifluhalol A on the weight of spleen after OVA inhalation exposure. Average weight of harvested spleen is presented. Dexamethasone 1.5 mg/kg (i.p.), AC extract 100 mg/kg (p.o.), Trifluhalol A 10 and 20 mg/kg (p.o.) were treated for each group. Data are presented as mean  $\pm$  S.E.M (N=5/group). \*\*\* Significantly different ( $p<0.001$ ) from normal group. ### Significantly different ( $p<0.001$ ) from OVA inhalation group.
